# Supplementary material for: Copper nanoparticles embedded fungal chitosan as a rational and sustainable bionanozyme with robust laccase activity for catalytic oxidation of phenolic pollutants
Source: Royal Society of Chemistry journal article supplement (doi:10.1039/d3ra06619c), 2023-01-01
Supplement: d3ra06619c1.pdf [file d3ra06619c1.pdf]

**Fungal chitosan-copper as a rational and sustainable nanozyme with intrinsic laccase activity for robust degradation of phenolic pollutants**

Efrata Getachew Mekonnen<sup>a</sup>, Kassie Nigus Shitaw<sup>b</sup>, Bing-Joe Hwang<sup>b,c</sup>, Yitayal Admassu Workie,<sup>d,e</sup> **Ebrahim M. Abda**<sup>\*a</sup> **Menbere Leul Mekonnen**<sup>\*d,e</sup>

---

<sup>a</sup> Biotechnology Department, Addis Ababa Science, and Technology University, Addis Ababa, P.O.Box 1647, Ethiopia.

<sup>b</sup> Department of Chemical Engineering, National Taiwan University of Science and Technology, Taipei 106, Taiwan

<sup>c</sup> National Synchrotron Radiation Research Center, Hsinchu, Taiwan

<sup>d</sup> Industrial Chemistry Department, Addis Ababa Science and Technology University, Addis Ababa, P.O. Box 1647, Ethiopia.

<sup>e</sup> Nanotechnology Center of Excellence, Addis Ababa Science and Technology University, Addis Ababa, P.O.Box 1647, Ethiopia.

---

**\*Corresponding authors:**

**Menbere Leul Mekonnen** ([menbere.leul@aastu.edu.et](mailto:menbere.leul@aastu.edu.et))

**Ebrahim M. Abda** ([ebrahim.mama@aastu.edu.et](mailto:ebrahim.mama@aastu.edu.et))

**Electronic Supplementary Material**

### **Chitosan extraction procedure**

The method used for chitin and chitosan extraction in this work followed the procedures described in elsewhere.<sup>1</sup> Briefly, the mycelia recovered by filtration through Whatman filter paper was subjected to repeated washing with distilled water and dried at 65 °C to a constant weight. Finely powdered dry fungal mycelia was then suspended in a 1 mol/L sodium hydroxide (1: 30 w/v), autoclaved for 20 minutes at 121 °C, and then centrifuged (6000 g ,15 min.) to separate the alkali-insoluble fraction (AIF). The AIF was then washed with distilled water, and centrifuged to a neutral pH. The residues were further extracted using 2 % acetic acid (1: 40 w/v) at 95 °C for 8 h. The extracted slurry was centrifuged at (6000 g ,15 min.) and the insoluble acid fraction was discarded. The solution was centrifuged at (12000 g ,15 min.) and the pH of the supernatant was corrected to 10 with 2 mol/L sodium hydroxide. The precipitated chitosan was then washed with distilled water, 95% ethanol, and acetone, respectively, and dried at 60 °C to a constant weight.

The resulting chitosan was checked for its degree of deacetylation and presence of important functional groups using Infrared absorption technique (FTIR Nicolet XX). First a 2 mg sample of chitosan was subjected to a KBr pellet ( 100 mg KBr) followed by scanning the absorbance from 400- 4000 cm<sup>-1</sup> Then the ratio of the absorbance at 1655 and 3450 cm<sup>-1</sup> (A<sub>1655</sub>/A<sub>3450</sub>.) after appropriate baseline subtraction was taken for calculation of the degree of deacetylation (DDA) according to equation 1

$$DA = \frac{A_{1655}}{A_{3450}} \times 115 \quad \text{Equation (S1)}$$

In these equations 1655 and 3450 cm<sup>-1</sup> represent the absorbance of chitosan at 1655, 3450,cm<sup>-1</sup> Further the average molecular weight of the obtained chitosan was estimated from its intrinsic viscosity using rotating viscometer (NDJ -8s, Shanghai) The intrinsic viscosity was determined from the y-intercept of the plot of specific viscosity vs concentration of chitosan solution in 0.2 M Sodium acetate and 0.3 M acetic acid. The molecular weight of the chitosan was then estimated according to the Mark–Houwink–Sakurada equation

$$[\eta] = KM^a \quad \text{Equation (S2)}$$

Where, M is viscosity molecular weight, K = 0.076 mL/g and a = 0.76 in this chitosan-solvent system

### Characterization of fungal chitosan

Fungal chitosan produced by the potent isolate was further characterized using FTIR and SEM. The chitosan that was dried in a powder form was investigated using Fourier transform infrared (FT-IR) spectroscopy at a 4  $\text{cm}^{-1}$  resolution at wave numbers ranging from 4000 to 400  $\text{cm}^{-1}$ . To analyze the surface morphology, scanning electron microscope were used. The sample was processed by self-coting with gold.

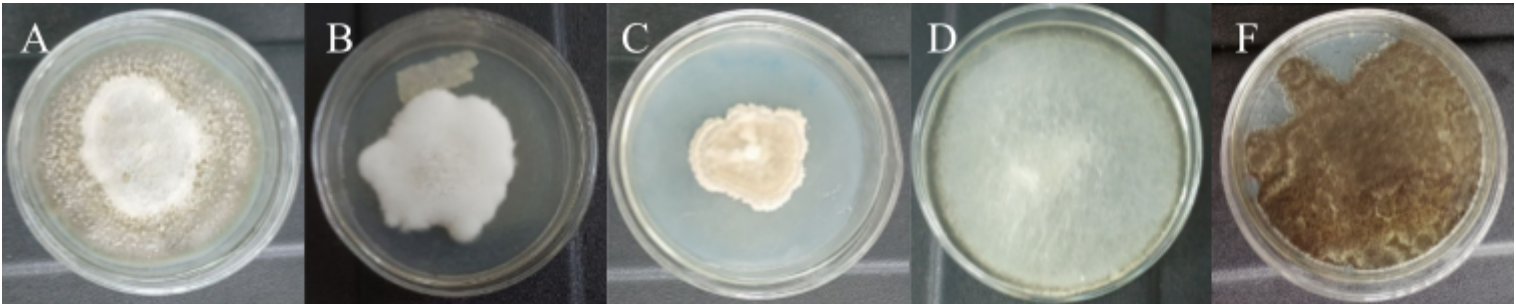

Figure S1 A representative fungal isolates cultured on PDA plates. (A) AWK1; (B) AWK2 ;( C) AWK7; (D) AWK3 and (F) AWK6

Table S1 chitosan yield by the isolated fungi in potato dextrose broth and minimal salt medium

| <b>isolate</b> | <b>Potato dextrose broth</b> |                             |                           |       | <b>Minimal salt medium</b>  |                           |        |  |
|----------------|------------------------------|-----------------------------|---------------------------|-------|-----------------------------|---------------------------|--------|--|
|                | <b>Code</b>                  | Fungal biomass<br>(g/100mL) | Chitosan<br>(mg/ g/100mL) | yield | Fungal biomass<br>(g/100mL) | Chitosan<br>(mg/ g/100mL) | yield  |  |
| AWK1           | 0.4                          |                             | 0.0018                    |       | 0.734                       |                           | 0.0065 |  |
| AWK2           | 0.46                         |                             | 0.0031                    |       | 0.561                       |                           | 0.0121 |  |
| AWK3           | 0.41                         |                             | 0.0058                    |       | 0.654                       |                           | 0.0124 |  |
| AWK6           | 0.354                        |                             | 0.0034                    |       | 0.449                       |                           | 0.0078 |  |
| AWK7           | 0.37                         |                             | 0.0038                    |       | 0.654                       |                           | 0.127  |  |
| AWK8           | 0.37                         |                             | 0.0008                    |       |                             |                           |        |  |
| AWK9           | 0.369                        |                             | 0.0004                    |       |                             |                           |        |  |
| AWK12          | 0.467                        |                             | 0.0014                    |       |                             |                           |        |  |
| AWK15          | 0.343                        |                             | 0.004                     |       |                             |                           |        |  |

Table S2: Taxonomic affiliation of the selected chitosan-producing fungi based on ITS rDNA sequences analysis.

| Isolate Code | Top-hit Taxon                            | Identity (%) | Taxonomy      |
|--------------|------------------------------------------|--------------|---------------|
| AWK2         | <i>Irpex</i> sp. isolate FS16            | >99          | Basidiomycota |
| AWK1         | <i>Schizophyllum commune</i> strain C77P | >99          | Basidiomycota |
| AWK7         | <i>Diaporthe</i> sp. isolate F255        | >97          | Ascomycota    |

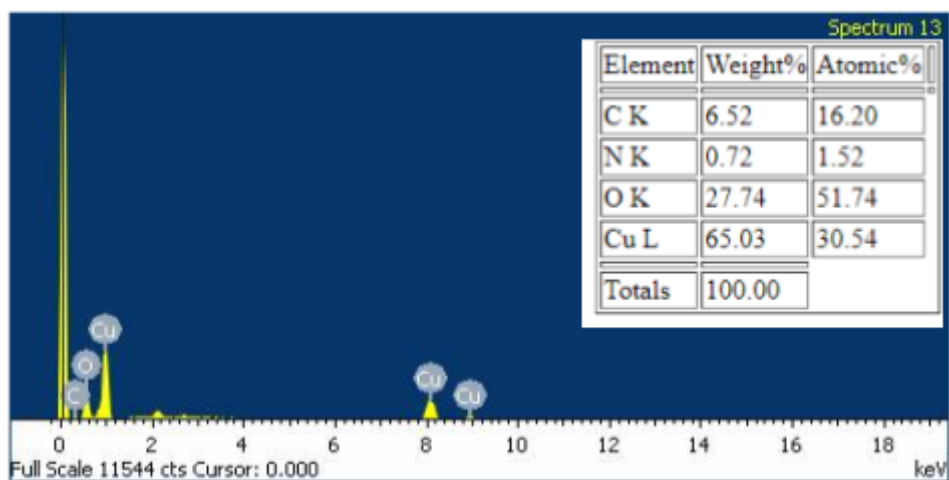

Figure S2: EDX spectrum of CsCu nanozymes

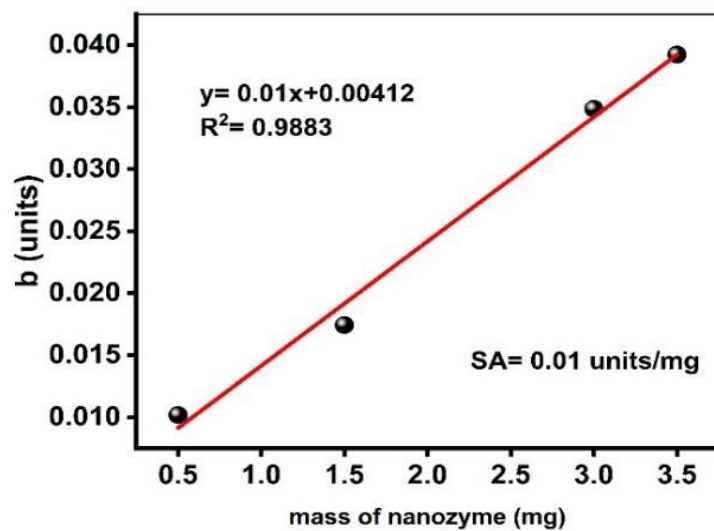

Figure S3: Activity of the CsCu nanozyme

- [1] P. Pochanavanich, W. Suntornsuk, Fungal chitosan production and its characterization, Letters in Applied Microbiology 35(1) (2002) 17-21.
